# Supplementary material
Source: PubMed Central journal article supplement (PMC7098779)
Supplement: jciinsight-5-134189-s058.pdf [file jciinsight-5-134189-s058.pdf]

Supplementary Figures and Tables

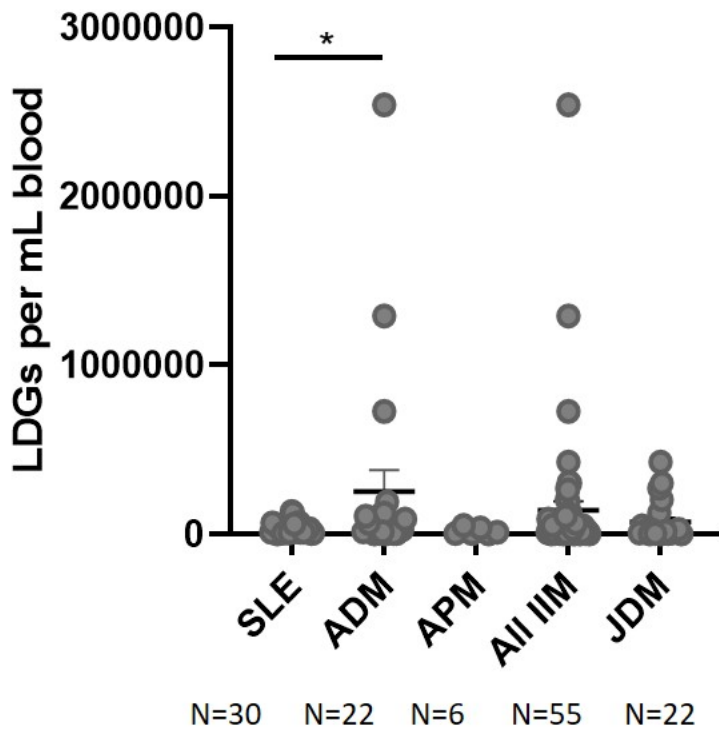

**Supplementary Figure 1. LDG levels in IIM are comparable to levels in SLE.** Graph displays numbers of LDGs/ml of blood and compare adult SLE, adult DM (ADM), adult PM (APM), all IIM (All IIM) and JDM. Numbers of subjects are shown under the bars and dots represent individual subjects. Results represent mean +SEM; \* p<0.05 by One-way ANOVA.

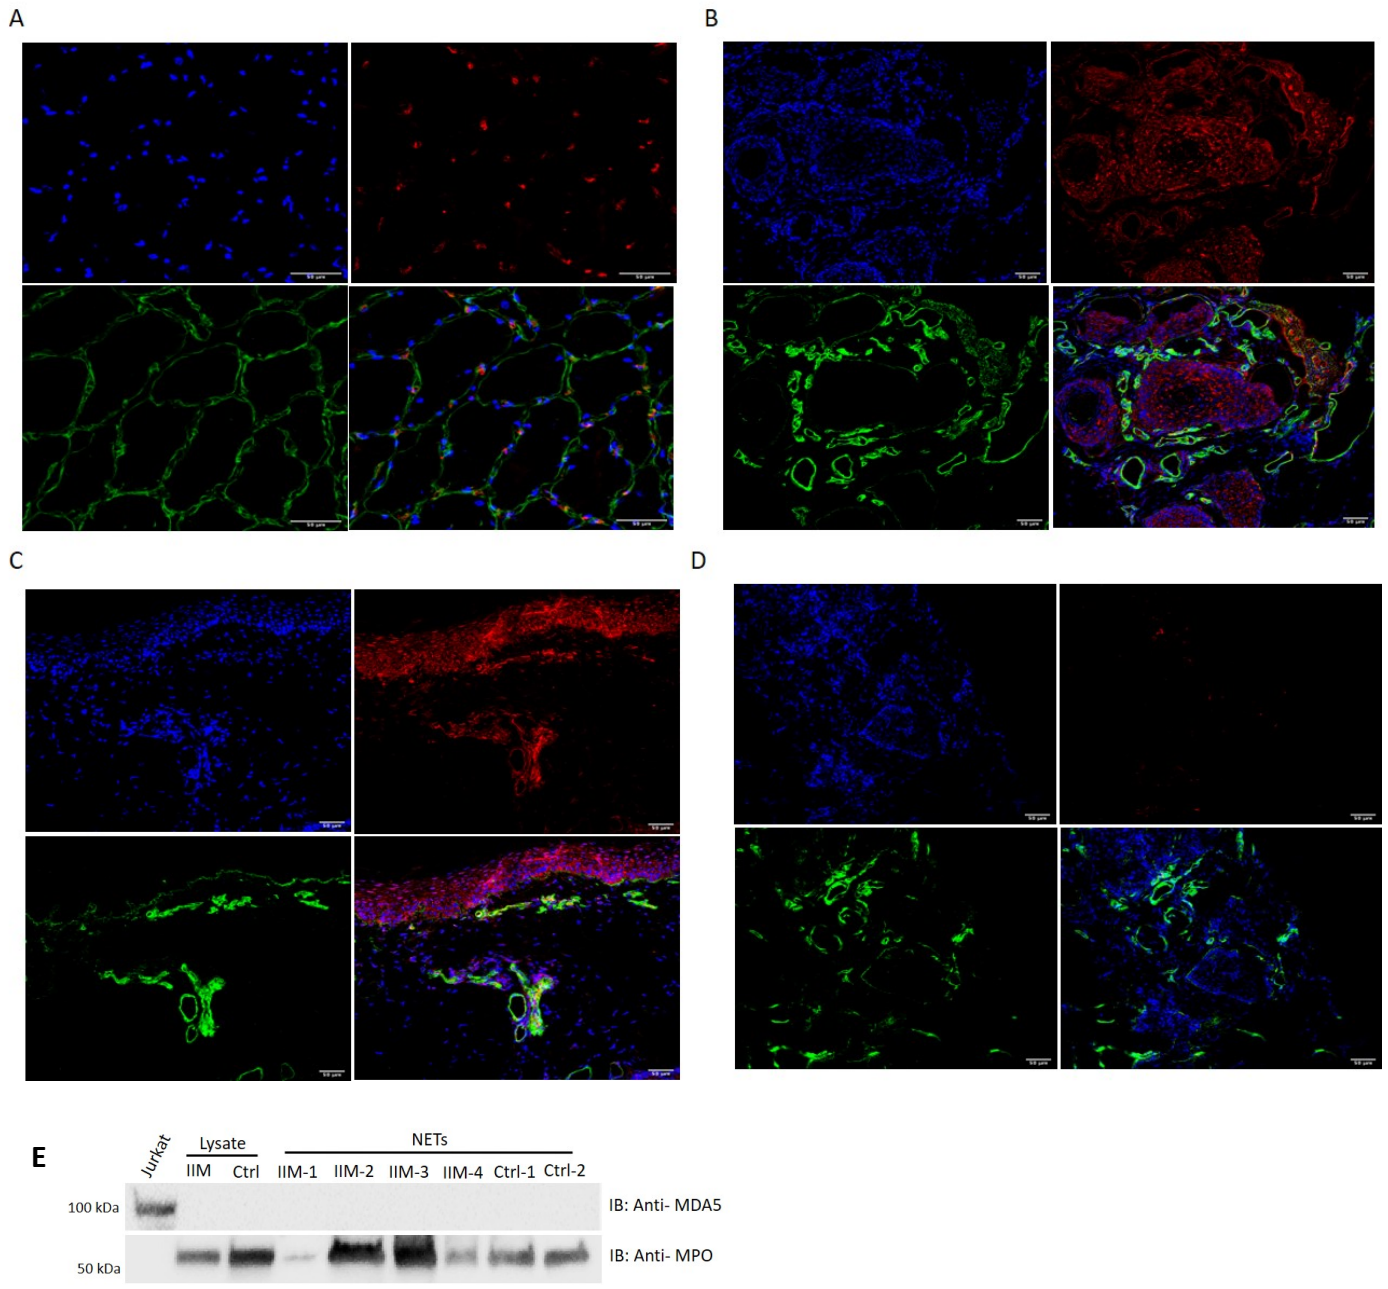

**Supplementary Figure 2. MDA5 antigen is detected in the muscle and skin of DM subjects but not in NETs.** MDA5 expression is detected in **A**. skeletal muscle capillaries in a subject with anti-MDA5 adult DM, and **B-C**. skin in a subject with anti-MDA5 adult DM. **D**. Isotype control for in skin in a subject with anti-MDA5 adult DM. Magnification is 20X for **B-D** and 40X for **A**. Red is MDA5, green is laminin and blue is DNA. Images are representative of 5 subjects. **E. MDA5 is not detected in IIM neutrophil lysates or NETs.** Western Blot analysis quantifying MDA-5 and MPO (positive control) in neutrophil lysates from a healthy control (Ctrl) and a subject with IIM (IIM), and in LPS-induced NETs from 2 healthy controls (Ctrl-1 and 2) or spontaneously formed NETs from 4 IIM subjects (IIM-1 to IIM-4). Jurkat cells were used as positive control for MDA5 expression.

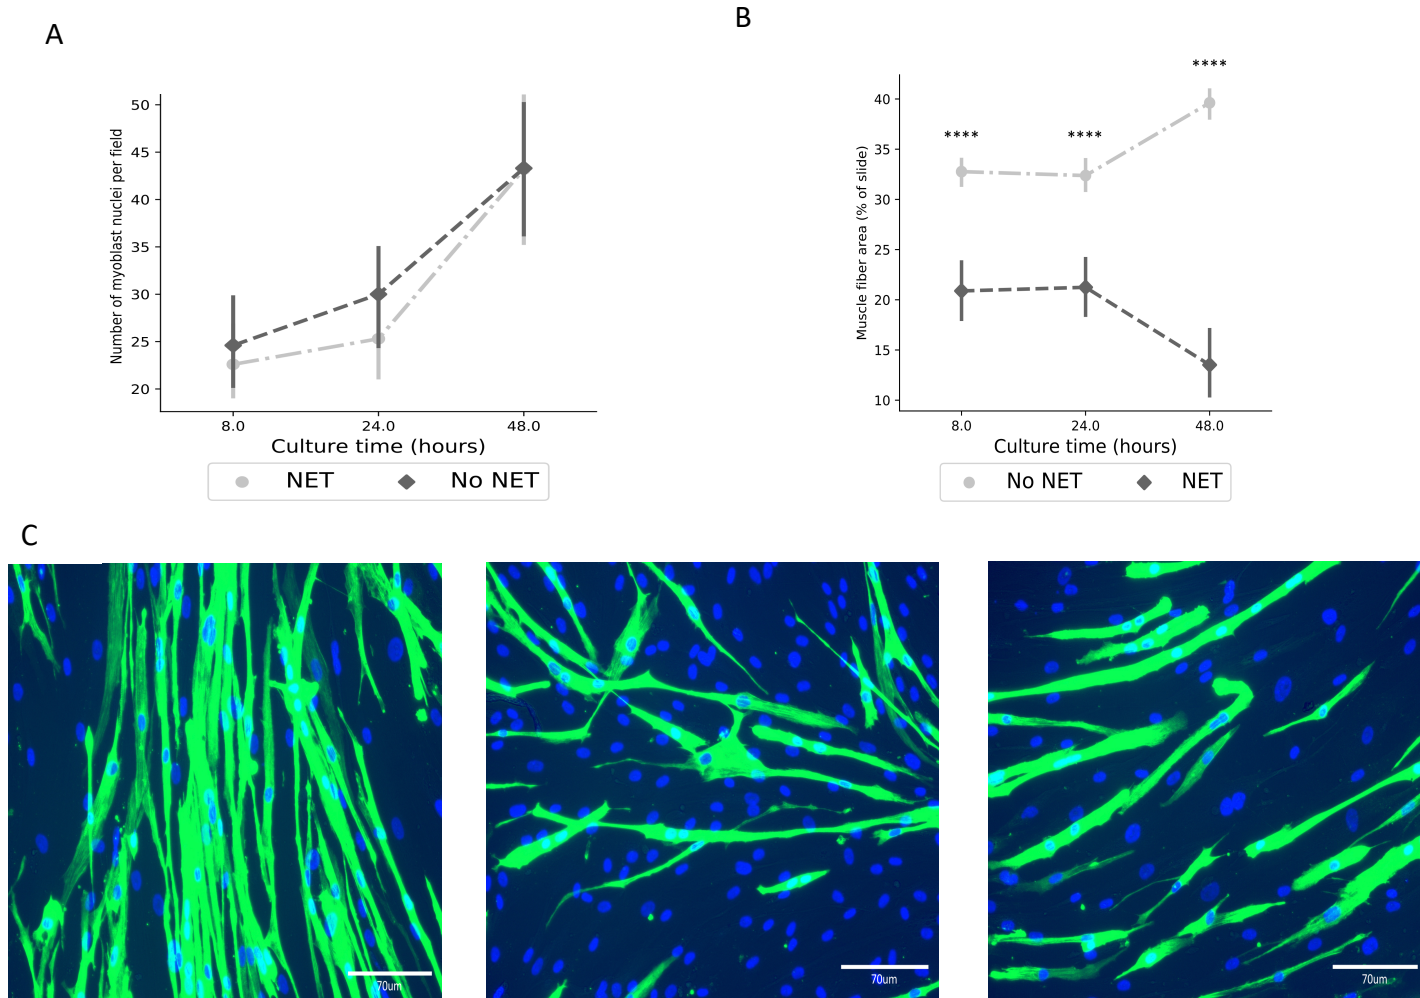

**Supplementary Figure 3. NETs do not decrease myoblast proliferation but do impair myotube viability in a human neutrophil elastase-independent manner. A. NETs do not impair myoblast proliferation.** Results represent number of skeletal muscle myoblast nuclei/field over a 48 h period in the presence or absence of NETs. Each time point corresponds to the average of counting 10 fields for each condition and the vertical lines show the 95% confidence interval of this count. P values >0.05 for all comparisons. **B. IIM NETs decrease skeletal muscle fiber area.** Results represent the area occupied by skeletal muscle myotubes over a 48 h period in the presence or absence of NETs. Each time point corresponds to the average of counting 10 fields for each condition and the vertical lines show the 95% confidence interval of this count;\*\*\*\* p<0.0001; Statistical analysis is by Student's T Test. ; **C. IIM NETs decrease myotube viability in a neutrophil-elastase independent-manner.** Left panel: Untreated myotubes; Middle panel: Myotubes + IIM NETs; Right panel: Myotubes +IIM NETs pretreated with the HNE inhibitor Sivelestat. Results are representative of 2 experiments, each using NETs from a different IIM subject.

| <b>Supplementary Table 1. Demographic/clinical characteristics of IIM cohorts used to quantify circulating LDGs and NETs.</b> |            |                |                |
|-------------------------------------------------------------------------------------------------------------------------------|------------|----------------|----------------|
| <b>Juvenile Dermatomyositis (JDM)</b>                                                                                         |            |                |                |
| <b>Demographics</b>                                                                                                           | <b>JDM</b> | <b>Control</b> | <b>P value</b> |
| Age (in years; mean ± SD)                                                                                                     | 12±6       | 12±3           | 0.881          |
| Female sex, n (%)                                                                                                             | 54 (64%)   | 41 (62%)       | 0.472          |
| <b>Race, n(%)</b>                                                                                                             |            |                |                |
| Caucasian                                                                                                                     | 65 (77%)   | 52 (79%)       | 0.472          |
| Black                                                                                                                         | 8 (10%)    | 3 (5%)         | 0.195          |
| Other                                                                                                                         | 3 (4%)     | 3 (5%)         | 0.546          |
| Mixed                                                                                                                         | 7 (8%)     | 5 (8%)         | 0.548          |
| <b>Ethnicity, n(%)</b>                                                                                                        |            |                |                |
| Hispanic                                                                                                                      | 13 (16%)   | 9 (14%)        | 0.353          |
| <b>History</b>                                                                                                                |            |                |                |
| Disease Duration (months ± SD)                                                                                                | 32±34      | -              | -              |
| Anti-MDA5, n(%)                                                                                                               | 15 (17%)   | -              | -              |
| Anti-NXP2, n(%)                                                                                                               | 15 (27%)   | -              | -              |
| Anti-TIF1, n(%)                                                                                                               | 31 (36%)   | -              | -              |
| Anti-SRP, n(%)                                                                                                                | 0 (0%)     | -              | -              |
| Anti-Jo-1, n(%)                                                                                                               | 4 (5%)     | -              | -              |
| Anti-PM/Scl, n(%)                                                                                                             | 2 (2%)     | -              | -              |
| Anti-Ro, n(%)                                                                                                                 | 13 (15%)   | -              | -              |
|                                                                                                                               |            |                |                |
|                                                                                                                               |            |                |                |
| <b>Adult Dermatomyositis (DM)</b>                                                                                             |            |                |                |
| <b>Demographics</b>                                                                                                           | <b>DM</b>  | <b>Control</b> | <b>P value</b> |
| Age (in years; mean ± SD)                                                                                                     | 46±16      | 40±13          | 0.051          |
| Female sex, n (%)                                                                                                             | 32 (71%)   | 67 (80%)       | 0.134          |
| <b>Race, n(%)</b>                                                                                                             |            |                |                |
| Caucasian                                                                                                                     | 32 (71%)   | 52 (62%)       | <b>0.035</b>   |
| Black                                                                                                                         | 7 (16%)    | 3 (4%)         | <b>0.032</b>   |
| Other                                                                                                                         | 1 (2%)     | 3 (4%)         | 0.565          |
| Mixed                                                                                                                         | 5 (11%)    | 5 (6%)         | 0.169          |
| <b>Ethnicity, n(%)</b>                                                                                                        |            |                |                |
| Hispanic                                                                                                                      | 4 (9%)     | 9 (10%)        | 0.327          |
| <b>History</b>                                                                                                                |            |                |                |
| Disease Duration (months ± SD)                                                                                                | 104±229    | -              | -              |
| Anti-MDA5, n(%)                                                                                                               | 1 (3%)     | -              | -              |
| Anti-NXP2, n(%)                                                                                                               | 7 (20%)    | -              | -              |

|                                |           |                |                |
|--------------------------------|-----------|----------------|----------------|
| Anti-TIF1, n(%)                | 7 (21%)   | -              | -              |
| Anti-SRP, n(%)                 | 1 (3%)    | -              | -              |
| Anti-Jo-1, n(%)                | 11 (23%)  | -              | -              |
| Anti-PM/Scl, n(%)              | 1 (2%)    | -              | -              |
| Anti-Ro, n(%)                  | 2(4%)     |                |                |
| <b>Adult Polymyositis (PM)</b> |           |                |                |
| <b>Demographics</b>            | <b>PM</b> | <b>Control</b> | <b>P value</b> |
| Age (in years; mean ± SD)      | 46±1      | 40±13          | 0.064          |
| Female sex, n (%)              | 17 (89%)  | 67 (80%)       | 0.514          |
| <b>Race, n(%)</b>              |           |                |                |
| Caucasian                      | 10 (53%)  | 52 (62%)       | 0.456          |
| Black                          | 7 (37%)   | 3 (4%)         | <b>0.000</b>   |
| Other                          | 2 (11%)   | 3 (4%)         | 0.229          |
| Mixed                          | 0         | 5 (6%)         | 0.353          |
| <b>Ethnicity, n(%)</b>         |           |                |                |
| Hispanic                       | 1 (5%)    | 9 (10%)        | 0.292          |
| <b>History</b>                 |           | -              | -              |
| Disease Duration (months ± SD) | 180±435   | -              | -              |
| Anti-MDA5, n(%)                | 0 (0%)    | -              | -              |
| Anti-NXP2, n(%)                | 0 (0%)    | -              | -              |
| Anti- TIF-1, n(%)              | 0 (0%)    | -              | -              |
| Anti-SRP, n(%)                 | 2 (12%)   | -              | -              |
| Anti-Jo-1, n(%)                | 5 (25%)   | -              | -              |
| Anti-PM/Scl, n(%)              | 0 (0%)    | -              | -              |
| Anti-Ro, n(%)                  | 0 (0%)    | -              | -              |

Chi squared Test or Fisher's Exact Test was used for categorical variables. The Student's t test was used for parametric data and Mann-Whitney U test was performed for nonparametric data. Statistically significant values are in bold. IIM=55; Controls=30 subjects.

**Supplementary Table 2. Demographic/clinical characteristics of adult autoantibody-negative DM cohort where skin biopsies were obtained and analyzed by immunofluorescence.**

| <b>Demographic and clinical characteristics (n=12)</b> | <b>Variable</b> |
|--------------------------------------------------------|-----------------|
| Age (in years; mean ± SD)                              | 49.2 ±19        |
| Female sex, n (%)                                      | 11 (92%)        |
| <b>Ethnicity, n(%)</b>                                 |                 |
| Caucasian                                              | 11 (92%)        |
| Black                                                  | 1 (8%)          |
| <b>Type of DM, n(%)</b>                                |                 |
| With muscle involvement                                | 8 (67%)         |
| Sine myositis                                          | 3 (33%)         |
| <b>Autoantibodies, n(%)</b>                            |                 |
| MSA                                                    | 0 (0%)          |
| ANA                                                    | 11 (92%)        |
| Anti-Ro                                                | 1 (8%)          |

MSA: myositis-specific autoantibodies; ANA: antinuclear antibody.

**Supplementary Table 3. Demographic/clinical characteristics of adult autoantibody-positive DM cohort where tissue biopsies were obtained and analyzed by immunofluorescence\*.**

| <b>Sex</b>    | <b>Age (years)</b> | <b>Diagnosis</b>         | <b>Autoantibody specificity</b> |
|---------------|--------------------|--------------------------|---------------------------------|
| <b>Muscle</b> |                    |                          |                                 |
| F             | 46                 | DM                       | MDA5                            |
| M             | 36                 | DM                       | NXP2                            |
| M             | 37                 | DM                       | MDA5                            |
| M             | 41                 | DM                       | NXP2                            |
| M             | 67                 | DM                       | TIF1                            |
| <b>Lung</b>   |                    |                          |                                 |
| F             | 59                 | DM                       | Ro52, Pm/Sc175                  |
| F             | 49                 | Clinically amyopathic DM | MDA5                            |
| <b>Skin</b>   |                    |                          |                                 |
| F             | 43                 | DM                       | MDA5                            |
| F             | 52                 | DM                       | Mi2                             |
| F             | 38                 | DM                       | NA                              |
| M             | 40                 | DM                       | MDA5                            |
| M             | 37                 | DM                       | MDA5                            |

M: Male; F: Female; \* This cohort was comprised of 100% Hispanic subjects of mixed race.

**Supplementary Table 4. Demographic/clinical characteristics of adult DM subjects where muscle biopsies were obtained for RNA sequencing.**

| N=39                                   | Variable    |
|----------------------------------------|-------------|
| Age at onset (in years; mean $\pm$ SD) | 58.0 (13.7) |
| Female %                               | 53%         |
| Race %                                 |             |
| Caucasian                              | 71%         |
| Black                                  | 18%         |
| Other                                  | 12%         |
| Autoantibody %(n)                      |             |
| Anti-Mi2                               | 28 (11)     |
| Anti-NXP2                              | 31 (12)     |
| Anti-TIF1                              | 28 (11)     |
| Anti-MDA5                              | 13 (5)      |



**Supplementary Table 5. Correlations between neutrophil parameters and clinical features in IIM cohorts.**

| Spearman Rho Assessment                     | ADM            |               |              |              | Median [IQR]    | PM             |               | JDM            |               |              |              | Median [IQR]     |
|---------------------------------------------|----------------|---------------|--------------|--------------|-----------------|----------------|---------------|----------------|---------------|--------------|--------------|------------------|
|                                             | MPO:DNA (N=46) | NE:DNA (N=46) | LDG % (N=23) | LDG # (N=22) |                 | MPO:DNA (N=20) | NE:DNA (N=20) | MPO:DNA (N=86) | NE:DNA (N=86) | LDG % (N=24) | LDG # (N=22) |                  |
| <b>Physician Global Activity Assessment</b> | -0.037         | -0.043        | -0.10        | -0.033       | 1.8 [0.45-4.7]  | 0.57**         | 0.073         | 0.18           | 0.2           | 0.14         | -0.001       | 2.5 [1.5-3.7]    |
| <b>HAQ/CHAQ</b>                             | 0.27           | 0.14          | -0.014       | 0.59         | 0.94 [0.35-1.8] | 0.27           | -0.23         | 0.073          | 0.042         | 0.093        | 0.035        | 0.63 [0.25-1.3]  |
| <b>Manual Muscle Test 8</b>                 | -0.22          | -0.074        | -0.062       | -0.156       | 71 [60-77]      | 0.059          | 0.28          | -0.13          | -0.11         | -0.083       | -0.48*       | 73 [67-78]       |
| <b>MDAAT:</b>                               |                |               |              |              |                 |                |               |                |               |              |              |                  |
| <b>Myositis Activity</b>                    | 0.024          | -0.007        | -0.05        | 0.17         | 5.25 [3.2-11]   | 0.221          | -0.11         | 0.26*          | 0.26*         | 0.12         | -0.035       | 9 [3.5-9.2]      |
| <b>Muscle</b>                               | 0.012          | -0.12         | 0.019        | -0.076       | 0.85 [0.3-3]    | 0.65**         | 0.07          | 0.09           | 0.16          | 0.002        | 0.129        | 1.8 [0.9-2.9]    |
| <b>Cutaneous</b>                            | 0.002          | 0.025         | -0.064       | -0.012       | 1.7 [0.5-4]     | -0.016         | -0.21         | 0.19           | 0.14          | 0.13         | -0.04        | 2.1 [1.1-4.1]    |
| <b>Pulmonary</b>                            | 0.199          | 0.18          | -0.061       | -0.14        | 0.6 [0-1.8]     | 0.059          | -0.40         | 0.24*          | 0.20          | -0.15        | 0.052        | 0.6 [0-1.2]      |
| <b>Cardiovascular</b>                       | 0.089          | 0.007         | -0.037       | 0.29         | 0 [0-0.3]       | 0.58**         | 0.30          | 0.17           | 0.06          | 0.16         | 0.31         | 0 [0-0.2]        |
| <b>Skeletal</b>                             | -0.132         | -0.24         | -0.07        | 0.21         | 0 [0-0.6]       | -0.2           | -0.44         | 0.21           | 0.34**        | 0.28         | -0.025       | 0.4 [0-1.3]      |
| <b>Extra-muscular</b>                       | 0.14           | 0.032         | -0.045       | -0.075       | 2.35 [0.95-5.2] | 0.37           | 0.09          | 0.22*          | 0.23*         | 0.19         | 0.083        | 2 [1.3-3.7]      |
| <b>Total Disease Activity Score (DAS):</b>  |                |               |              |              |                 |                |               |                |               |              |              |                  |
| <b>DAS Skin</b>                             | 0.053          | 0.107         | -0.30        | 0.004        | 5 [4-6.5]       | -0.17          | -0.26         | 0.05           | 0.018         | 0.42*        | 0.17         | 5 [5-7]          |
| <b>DAS Muscle</b>                           | 0.068          | 0.06          | -0.07        | 0.19         | 5 [2.5-7.5]     | 0.008          | -0.34         | 0.12           | 0.084         | 0.073        | 0.24         | 5 [3-7]          |
| <b>Muscle Enzymes (U/L)</b>                 |                |               |              |              |                 |                |               |                |               |              |              |                  |
| <b>CK</b>                                   | 0.35*          | 0.31*         | -0.054       | -0.35        | 113 [72-227]    | 0.50*          | 0.34          | -0.013         | 0.096         | -0.14        | -0.091       | 93 [63.25-138.5] |
| <b>Aldolase</b>                             | 0.22           | 0.33*         | -0.11        | 0.12         | 6.7 [5-9]       | 0.29           | -0.07         | 0.038          | 0.065         | 0.21         | 0.12         | 6 [5.1-8.28]     |
| <b>AST</b>                                  | 0.43**         | 0.25          | 0.021        | 0.18         | 22.5 [17-34.25] | 0.42           | 0.054         | 0.17           | 0.097         | 0.19         | 0.24         | 25 [19-33]       |
| <b>LDH</b>                                  | 0.48**         | 0.21          | -0.12        | 0.12         | 205 [174-247]   | 0.37           | -0            | 0.19           | 0.034         | 0.29         | 0.25         | 193 [147-221]    |

|                                  |      |        |        |        |                    |        |       |       |       |        |        |                    |
|----------------------------------|------|--------|--------|--------|--------------------|--------|-------|-------|-------|--------|--------|--------------------|
| <b>Physician Global Damage</b>   | 0.13 | 0.017  | -0.347 | -0.35  | 2.2 [0.53-5.2]     | 0.031  | -0.44 | 0.021 | 0.1   | -0.086 | -0.401 | 1.7 [0.7-2.6]      |
| <b>Disease Duration (months)</b> | 0.08 | -0.032 | -0.21  | -0.57* | 110                | -0.014 | .130  | -.200 | -.065 | -0.49  | -0.59* | 20.0               |
| <b>Capillary Density</b>         | .036 | -.36   | -.54   | -.72   | 5.124 [3.04-11.69] | -      | -     | .28   | -.12  | -0.58* | .014   | 5.509 [3.97-11.28] |
| <b>Steroid Dose PW</b>           | 0.02 | 0.05   | -0.26  | -0.33  | 0.21 [0.09-0.375]  | 0.48   | 0.17  | 0.09  | 0.29* | 0.17   | 0.20   | 0.355 [0.165-7.65] |
| <b>Number of Meds</b>            | 0.04 | -0.06  | -0.17  | -0.23  | 3 [2-4]            | 0.08   | -0.04 | 0.04  | -0.04 | 0.08   | 0.09   | 3.5 [2-5]          |

ADM: adult dermatomyositis; PM: polymyositis; JDM: juvenile dermatomyositis; HNE: human neutrophil elastase; MPO: myeloperoxidase; HAQ: health assessment questionnaire; CHAQ: childhood health assessment questionnaire; \* p<0.05; \*\* p<0.01; \*\*\* p<0.001; \*\*\*\* p<0.0001. Spearman Correlations were used for analyses. LDG correlations were not performed in PM given small sample size.
